# Supplementary material for: The TuMYB46L‐TuACO3 module regulates ethylene biosynthesis in einkorn wheat defense to powdery mildew
Source: PubMed Central journal article supplement — New Phytol. 2019 Dec 16;225(6):2526–41. doi: 10.1111/nph.16305 (PMC7065006; doi:10.1111/nph.16305), 2019-12-16
Supplement: NPH-225-2526-s002.pdf [file NPH-225-2526-s002.pdf]

## Supporting Information

Article title: **The *TuMYB46L-TuACO3* module regulates ethylene biosynthesis in einkorn wheat defense to powdery mildew**

Authors: Hongyuan Zheng, Lingli Dong, Xinyun Han, Huaibing Jin, Cuicui Yin, Yali Han, Bei Li, Huanju Qin, Jinsong Zhang, Qianhua Shen, Kunpu Zhang, Daowen Wang.

**Article acceptance date:** 22 October 2019.

**Fig. S1** Morphology of transgenic wheat lines overexpressing *TuACO3* or *TuMYB46L*.

**Fig. S2** Phylogenetic analysis of *ACO* genes from different plant species.

**Fig. S3** Elevation of *TuACO3* expression and ethylene production by *Bgt* infection in five different *T. urartu* accessions and analysis of *TaACO3* function in common wheat using BSMV-mediated VIGS.

**Fig. S4** Inhibition of *Bgt* colony development and growth by ethylene treatment in five different *T. urartu* accessions.

**Fig. S5** Primary structure, phylogeny and nuclear localization of TuMYB46L and predicted MYB46 binding sites in the 2 kb promoter region of *TuACO3*.

**Fig. S6** Effects of transiently overexpressing or silencing *TuMYB46L* on *Bgt* haustorium growth and analysis of *TaMYB46L* function by VIGS in common wheat.

**Fig. S7** Elevation of *TuACS2* transcript level by *Bgt* infection at 24 hpi.

**Fig. S8** Suppression of *AtACO4* promoter activity by *AtMYB46*.

**Table S1** PCR primers used in this study

**Table S2** List of six *T. urartu* genes found in two independent Y1H screens

**Table S3** Significantly enriched biological processes identified by GO analysis

**Table S4** Expression changes of the four chitinase genes up-regulated by both ethylene treatment and *Bgt* infection

**Table S5** Presence of putative MYB46 recognition sites in the 2 kb promoter region of the five genes related to cellulose or isoprenoid synthesis

**Methods S1** Additional description of methods

**Dataset S1** Sequence information and raw data (see separate file)

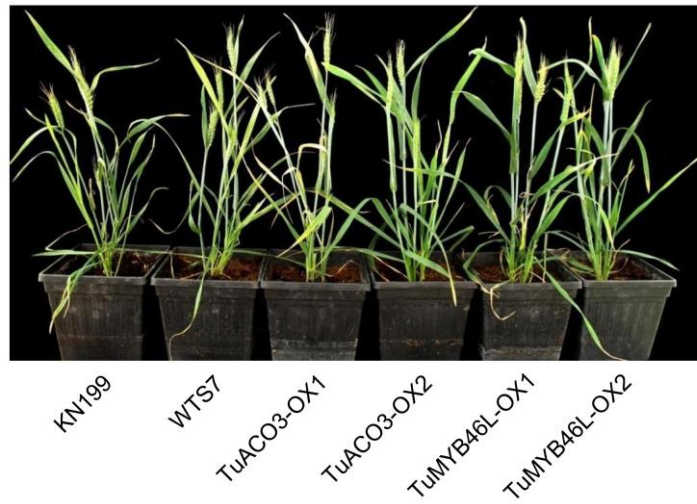

**Fig. S1** Morphology of transgenic wheat lines overexpressing *TuACO3* or *TuMYB46L*. Kenong 199 (KN199) was the common wheat cultivar used as the recipient for genetic transformation. WTS7 was a wild type segregate. The transgenic lines overexpressing *TuACO3* (TuACO3-OX1 and -OX2) or *TuMYB46L* (TuMYB46L-OX1 and -OX2) resembled KN199 and WTS7 in their growth and development in the greenhouse.

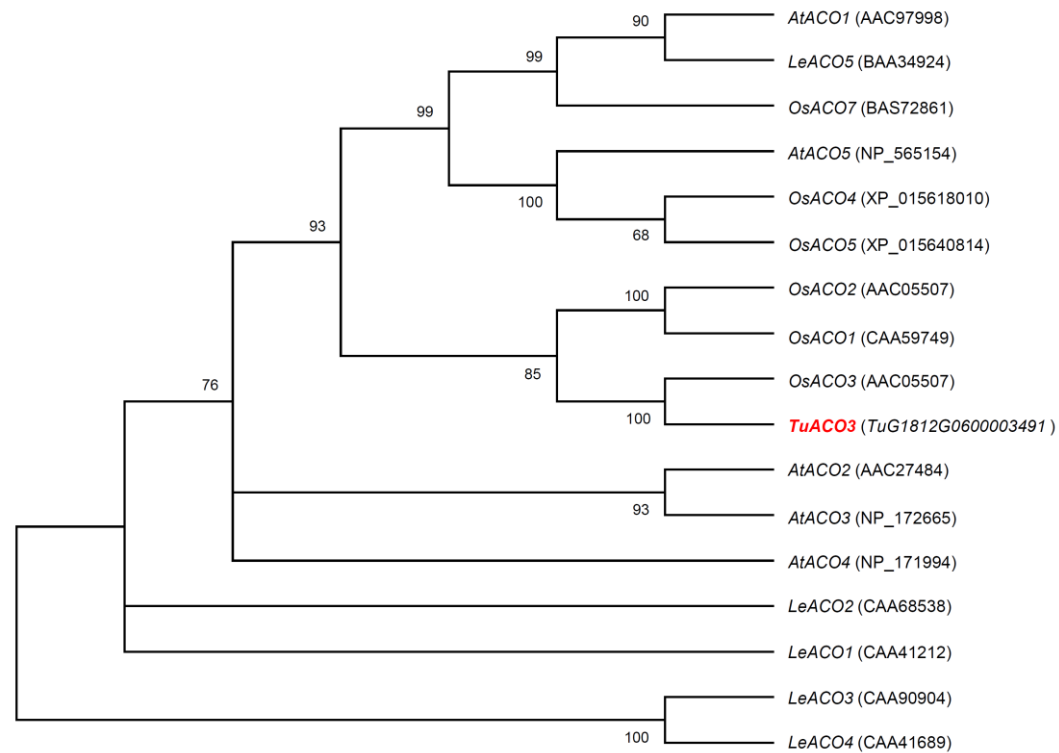

**Fig. S2** Phylogenetic analysis of *ACO* genes from different plant species. The tree shown was constructed using the deduced protein sequences of 17 plant *ACO* genes whose GenBank accession number or chromosomal locus designation (for *TuACO3*) were provided in the brackets. The neighbor joining algorithm (installed at the MEGA website <https://www.megasoftware.net/>) and the complete deletion distance option were used for tree construction. The bootstrap values were obtained using 1000 replications.

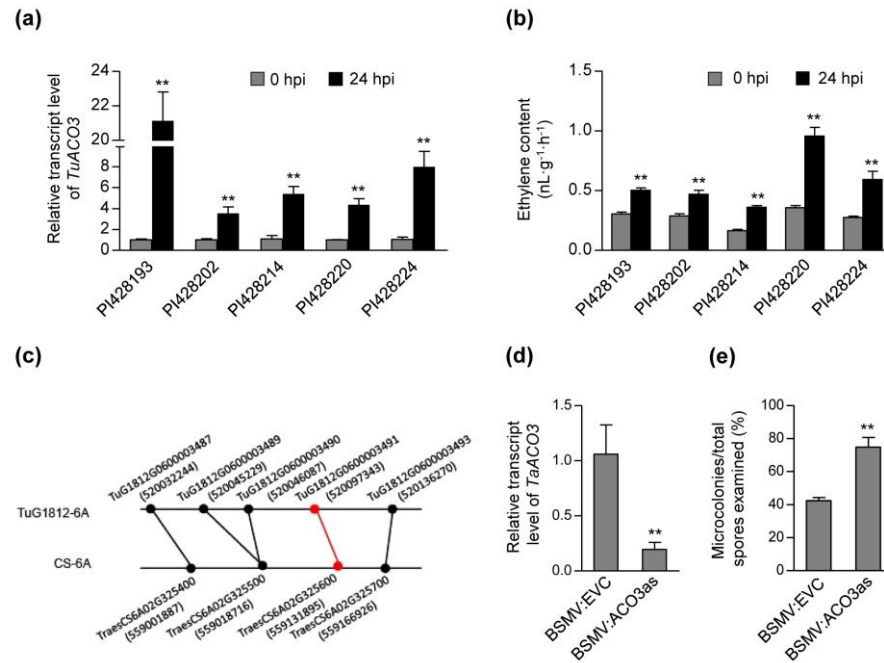

**Fig. S3** Elevation of *TuACO3* expression and ethylene production by *Bgt* infection in five different *T. urartu* accessions and analysis of *TaACO3* function in common wheat using BSMV-mediated VIGS. (a) Elevation of *TuACO3* transcript level by *Bgt* infection revealed by qRT-PCR. The samples analyzed were taken at 0 and 24 hpi, respectively. (b) Up-regulation of ethylene production by *Bgt* infection determined using gas chromatography. (c) Identification of the ortholog of *TuACO3* (TuG1812G0600003491 located on the 6A chromosome of G1812) in the common wheat cultivar Chinese Spring (CS) through analyzing syntenic collinear genes. The common wheat ortholog (*TaACO3*, TraesCS6A02G325600) was located on the 6A chromosome of CS. The number in the brackets indicate the position of the gene along the assembled chromosome of G1812 or CS. (d, e) Efficient decrease of *TaACO3* transcript level in common wheat by the recombinant virus BSMV:ACO3as (d) and significant increase of *Bgt* microcolonies in the plants in which *TaACO3* was silenced by BSMV:ACO3as. The numerical data shown were reproducible in three independent experiments. Each mean ( $\pm$  SE) was determined using five (a, b) or three (d, e) biological replicates. \*\*,  $P < 0.01$  (Student's *t*-test).

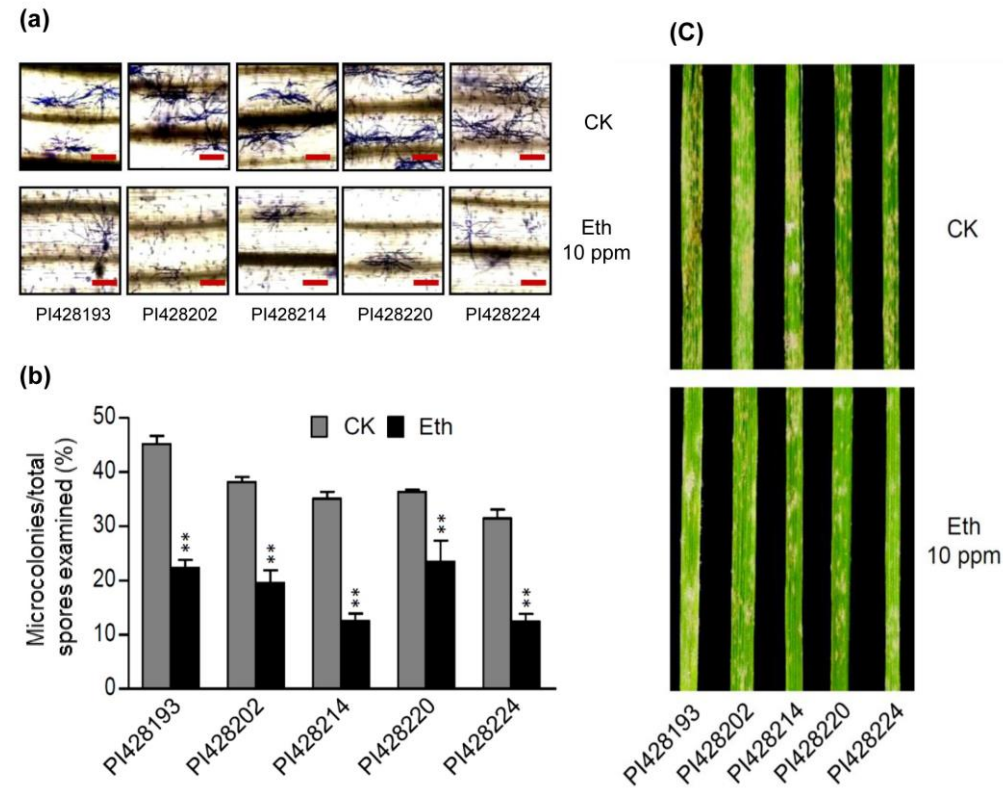

**Fig. S4** Inhibition of *Bgt* colony development and growth by ethylene treatment in five different *T. urartu* accessions. The *Bgt* isolate used in the inoculation was E09. (a, b) Differences in *Bgt* microcolony development between ethylene treated plants and untreated controls (CK) at 72 hpi, as shown by Coomassie blue staining of fungal structures (a) and quantitative comparison (b). (c) Comparison of *Bgt* colonies in ethylene treated plants and untreated controls (CK) at 8 dpi. The data shown were representative of three independent experiments. Each mean ( $\pm$ SE) was calculated using five biological replicates. \*\*,  $P < 0.01$  (Student's *t*-test). Bars, 200  $\mu$ m.



constructed with the deduced amino acid sequences of eight MYB46 homologs whose GenBank accession number or chromosomal locus designation (for TuMYB46L) are provided in the brackets. The number of amino acid residues and the molecular mass of the predicted proteins are also presented. (d) Nuclear localization of TuMYB46L-YFP fusion protein in the leaf cells of *N. benthamiana*. The TuMYB46L-YFP fusion protein was expressed from the T-DNA construct p35S:TuMYB46L-YFP by agroinfiltration (Methods S1). The infiltrated leaf was counter-stained with the nucleophilic compound 4',6-diamidino-2-phenylindole (DAPI), followed by microscopic examination under YFP and DAPI channels, respectively. The TuMYB46L-YFP signal (arrowed) was confirmed to be in the nucleus after merging the images taken under YFP and DAPI channels, respectively. The data shown was typical of three separate experiments. Bars, 25  $\mu$ m.



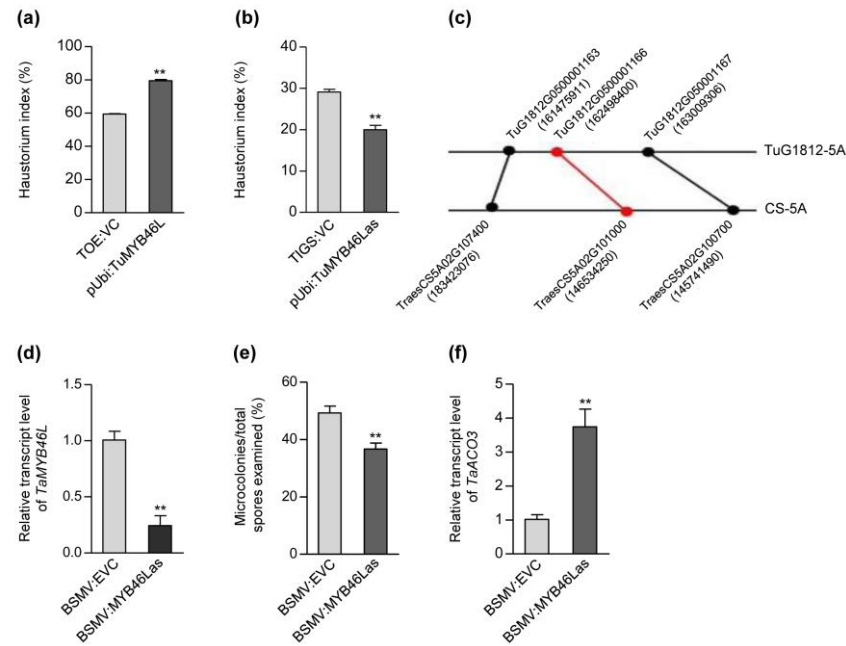

**Fig. S6** Effects of transiently overexpressing or silencing *TuMYB46L* on *Bgt* haustorium growth and analysis of *TaMYB46L* function by VIGS in common wheat. (a, b) *Bgt* haustorium growth in G1812 leaf cells was stimulated by transiently expressing *TuMYB46L* from the construct pUbi:MYB46L, but suppressed by transiently silencing *TuMYB46L* with the construct pUbi:MYB46Las. TOE:VC and TIGS:VC, empty vector controls. (c) Identification of the ortholog of *TuMYB46L* (TuG1812G0500001166 located on the 5A chromosome of G1812) in the common wheat cultivar Chinese Spring (CS) through analyzing syntenic collinear genes. The common wheat ortholog (*TaMYB46L*, TraesCS5A02G101000) was located on the 5A chromosome of CS. The number in the brackets indicate the position of the gene along the assembled chromosome of G1812 or CS. (d-f) Significant decrease of *TaMYB46L* transcript level in common wheat by the recombinant virus BSMV:MYB46Las (d), which led to substantial reduction of *Bgt* microcolonies (e) and clear increase of *TaACO3* transcript level (f) in the plants in which *TaMYB46L* was silenced by BSMV:MYB46Las. The results in (a) and (b) were typical of two independent experiments, with each mean ( $\pm$  SE) calculated from the data of three technical repeats (more than 200 transfected cells examined in each repeat). The data in (d) to (f) were represent of three independent experiments, with each mean ( $\pm$  SE) calculated from three biological replicates. \*\*,  $P < 0.01$  (Student's *t*-test).

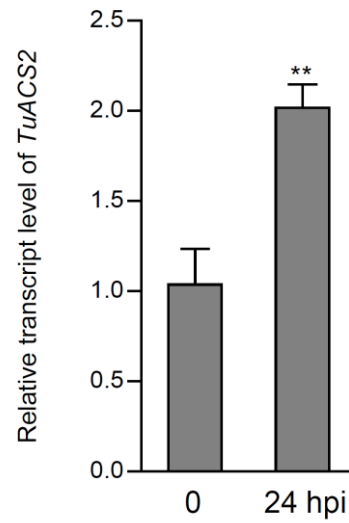

**Fig. S7** Elevation of *TuACS2* transcript level by *Bgt* infection at 24 hpi. Three *ACS* genes, *TuACS1* (TuG1812G0300001193), *TuACS2* (TuG1812G0400000544) and *TuACS3* (TuG1812G0700000711), were annotated in the genomic sequence of the *T. urartu* accession G1812 (Ling *et al.*, 2018). By qRT-PCR assay with gene specific primers (Table S1), only the transcript level of *TuACS2* was found to be significantly up-regulated by *Bgt* at 24 hpi. The result displayed was typical of three independent experiments. Each mean ( $\pm$  SE) was determined from three biological replicates. \*\*,  $P < 0.01$  (Student's *t*-test).

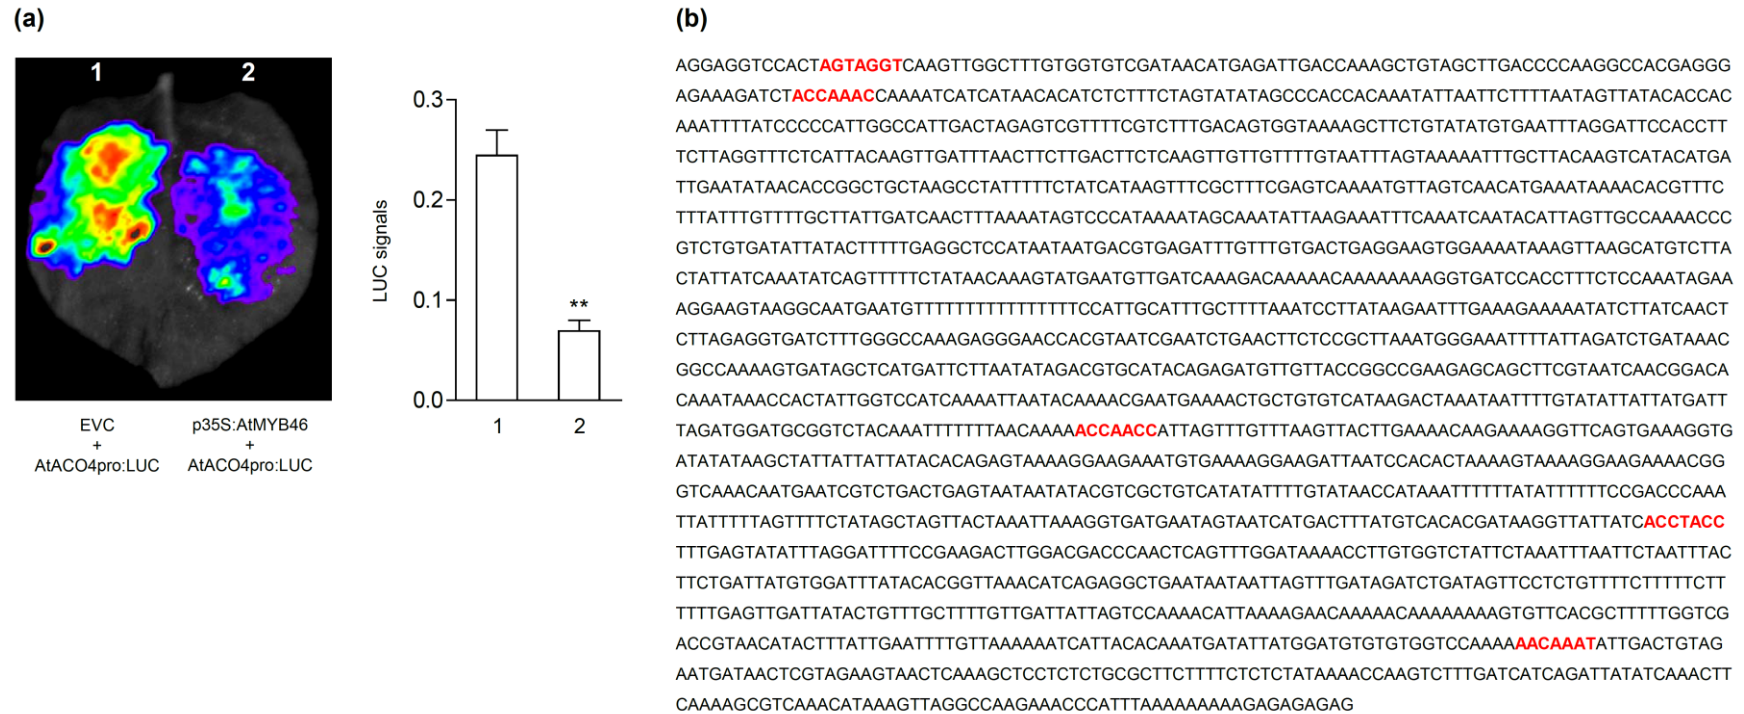

**Fig. S8** Suppression of *AtACO4* promoter activity by *AtMYB46*. (a) Suppression of *AtACO4* promoter activity by *AtMYB46* transiently expressed from the construct p35S:*AtMYB46* in *N. benthamiana* leaf cells, as indicated by luminescence imaging (left panel) and quantitative comparison of luciferase signals (right panel). (b) Presence of five putative MYB46 binding sites (highlighted in red) in the 2 kb promoter region of *AtACO4*. The data shown in (a) were representative of three independent experiments. Each mean ( $\pm$  SE) was determined from three biological replicates. \*\*,  $P < 0.01$  (Student's *t*-test).

**Table S1** PCR primers and oligonucleotides used in this study

| Primer name               | Use                                                                       | Forward primer (5'-3')                                  | Reverse primer (5'-3')                                    |
|---------------------------|---------------------------------------------------------------------------|---------------------------------------------------------|-----------------------------------------------------------|
| Wheat actin gene          | qRT-PCR                                                                   | CAACGAGCTCCGTGTCCGA                                     | GAGGAAGCGTGTATCCCTCATAG                                   |
| <i>TuACO3</i>             | qRT-PCR                                                                   | CTGTGCGAGAACCTGGGC                                      | GCGACCAGGTCGGGGCGC                                        |
| <i>TuMYB46L</i>           | qRT-PCR                                                                   | TGCCCCGGCAGCAAGTGCAG                                    | TCCGCAGCATGTACGCCACC                                      |
| <i>TuACO3</i>             | qRT-PCR                                                                   | CTGTGCGAGAACCTGGG                                       | GGCGTCGGTGTGCGCGCG                                        |
| <i>TuMYB46L</i>           | qRT-PCR                                                                   | TGCCCCGGCAGCAAGTGCAG                                    | TCCGCAGCATGTACGCCACC                                      |
| <i>TuACS2</i>             | qRT-PCR                                                                   | ACGCGCTCGGCTCCGCCG                                      | CGCCACCCTGAAGTCTCTCT                                      |
| <i>TuG1812G0200004053</i> | qRT-PCR                                                                   | CATGGCGATGCTCCCGTTC                                     | CAGTAGGGCGTCGGTAGTGCC                                     |
| <i>TuG1812G0200004054</i> | qRT-PCR                                                                   | CATGGCGATCTTGGCTCTCG                                    | CATGGCGATCTTGGCTCTCG                                      |
| <i>TuG1812G0300003072</i> | qRT-PCR                                                                   | GCAGCGGCGGCACCCCGGT                                     | CCTTGGCCAGGCACGCCGCG                                      |
| <i>TuG1812G0100002418</i> | qRT-PCR                                                                   | CTGCCCTCGCCGTGTGCCCC                                    | GCATGCTCGCGTACACCGACC                                     |
| TuACO3-CDS                | CDS cloning                                                               | ATGGCAATTCCTGCTAATGC                                    | TCACGCAGTGGCGATGGGC                                       |
| TuMYB46L-CDS              | CDS cloning                                                               | ATTTAATTAGCTAAACATGTG                                   | CGTCTCTCTCTCTCTCTCTC                                      |
| TuACO3-PRO                | Promoter cloning                                                          | CAGCCCCTTCTATCCTTCG                                     | TCACTCAACTTGGAAATCAAGG                                    |
| pDONR201-TuACO3 (TIGS)    | Constructing pUbi:TuACO3as for transiently silencing <i>TuACO3</i>        | GGGGACAAGTTTGTACAAAAAAGCAGGCTTCCTGTGCGA<br>GAACCTGGGC   | GGGGACCACCTTTGTACAAGAAAGCTGGGTCGCGACCAGGTC<br>GGGGCGC     |
| pDONR201-TuMYB46L (TIGS)  | Constructing pUbi:TuMYB46Las for transiently silencing <i>TuMYB46L</i>    | GGGGACAAGTTTGTACAAAAAAGCAGGCTTCTGCCCGGC<br>GACGAAGTGCAG | GGGGACCACCTTTGTACAAGAAAGCTGGGTCGTCCGCAGCAT<br>GTACGCCAC   |
| pDONR201-TuMYB46L-YFP     | Constructing p35S:TuMYB46L-YFP for nuclear localization of TuMYB46L       | GGGGACAAGTTTGTACAAAAAAGCAGGCTTCATGAGGAA<br>GCCCGTGGAGTG | GGGGACCACCTTTGTACAAGAAAGCTGGGTCTCAACTTGGAA<br>AATCAAGG    |
| pDONR201-TuACO3           | Constructing pUbi:TuACO3 for transiently overexpressing <i>TuACO3</i>     | GGGGACAAGTTTGTACAAAAAAGCAGGCTTCATGGCAATT<br>CCTGCTAATGC | GGGGACCACCTTTGTACAAGAAAGCTGGGTCTCACGCAGTGG<br>CGATGGGC    |
| pDONR201-TuMYB46L         | Constructing pUbi:TuMYB46L for transiently overexpressing <i>TuMYB46L</i> | GGGGACAAGTTTGTACAAAAAAGCAGGCTTCATGAGGAA<br>GCCCGTGGAGTG | GGGGACCACCTTTGTACAAGAAAGCTGGGTCTCACTCAACTTG<br>GAAATCAAGG |
| VIGS-ACO3                 | Constructing BSMV- $\gamma$ vector for silencing <i>TuACO3</i>            | AAGGAAGTTTAACTGTGCGAGAACCTGGGC                          | AACCACCACCACCGTTCGCGACCAGGTCGGGGCGC                       |
| VIGS-MYB46L               | Constructing BSMV- $\gamma$ vector for silencing <i>TuMYB46L</i>          | AAGGAAGTTTAACTGCCCGCGACGAAGTGCAG                        | AACCACCACCACCGTTCGCGAGCATGTACGCCACC                       |
| pHZ206-TuACO3             | Constructing overexpressing vector for <i>TuACO3</i>                      | AGATCCAGTGGGATCCATGGCAATTCCTGCTAATGC                    | TTATAGTCAAGCTTGGTACCCGCAGTGGCGATGGGC                      |
| pHZ206-TuMYB46L           | Constructing overexpressing vector for <i>TuMYB46L</i>                    | AGATCCAGTGGGATCCATGAGGAAGCCCGTGGAGTG                    | TTATAGTCAAGCTTGGTACCCCTCAACTTGGAAATCAAGG                  |
| pABAi-TuACO3-PRO          | Constructing Y1H BD vector                                                | TTGAATTCGAGCTCGGTACCCAGCCCTTCTATCCTTCG                  | ATGCCTCGAGGTCGACCGCTCTCTCTCTCTCTCTCTCTC                   |
| pGADT7-TuMYB46L           | Constructing Y1H AD vector                                                | CAGATTACGCTCATATGATGAGGAAGCCCGTGGAGTG                   | CACCCGGGTGGAATTCCTCACTCAACTTGGAAATCAAGG                   |
| pGADT7-GFP                | Constructing Y1H AD vector                                                | CAGATTACGCTCATATGATGGTGAGCAAGGGCGGAGGA                  | CACCCGGGTGGAATTCCTACTTGTACAGCTCGTCCA                      |
| pLL00r-TuACO3-PRO         | Constructing reporter vector                                              | GGCCAGTGCCAAGCTTCAGCCCTTCTATCCTTCG                      | CCTCTAGAGTCGACCTGCAGCGCTCTCTCTCTCTCTCTCT                  |

|                 |                                                                                       |                                          |                                            |
|-----------------|---------------------------------------------------------------------------------------|------------------------------------------|--------------------------------------------|
| pRI101-TuMYB46L | Constructing effector vector                                                          | ACATATGCCCGTCGACATGAGGAAGCCCGTGGAGTG     | CAGAATTCGGATCCGGTACCCTCAACTTGGAAATCAAGG    |
| pRI101-GFP      | Constructing effector vector                                                          | ACATATGCCCGTCGACATGGTGAGCAAGGGCGAGGA     | CAGAATTCGGATCCGGTACCCTCAACTTGTACAGCTCGTCCA |
| pET32a-TuACO3   | Constructing <i>E. coli</i> expression vector for expressing TuACO3 HIS tag protein   | CGGTTCTGGTTCTGGCCATATGGCAATTCCTGCTAATGC  | CCGCAAGCTTGTGACCCGACGTGGCGATGGGCGC         |
| pET32a-TuMYB46L | Constructing <i>E. coli</i> expression vector for expressing TuMYB46L HIS tag protein | CGGTTCTGGTTCTGGCCATATGAGGAAGCCCGTGGAGTG  | CCGCAAGCTTGTGACCTCAACTTGGAAATCAAGG         |
| ChIP-TuACO3-1   | ChIP-qPCR                                                                             | TTCTTCTTCTTTCTTGAGG                      | GATCTAGTATCTCGACTTTC                       |
| ChIP-TuACO3-2   | ChIP-qPCR                                                                             | CTAGATCCGTCCAATTGTAAG                    | GCGTCATCTCGAGTCAATAA                       |
| ChIP-TuACO3-3   | ChIP-qPCR                                                                             | GACTCGAGATGACGCATCAA                     | CCAGTGTGTGTTATTTGTGTG                      |
| ChIP-TuACO3-4   | ChIP-qPCR                                                                             | ACACACACTGGCAAATACAT                     | GTCTTATCCGTCACGGAAAG                       |
| ChIP-TuACO3-5   | ChIP-qPCR                                                                             | GCTTTCCGTGACGGATAAGA                     | GAGAGAAGACAGCCCATG                         |
| ChIP-TuACO3-6   | ChIP-qPCR                                                                             | CATGGGGCTGTCTTCTCTC                      | GACTCGCCACCTCTAGTGG                        |
| ChIP-TuACO3-7   | ChIP-qPCR                                                                             | GAGGTGGCCGATCATGTCA                      | CATTGTCCGAAAACCTATCTC                      |
| ChIP-TuACO3-8   | ChIP-qPCR                                                                             | CGGACAATGCCATGGGTCTC                     | GGTCTCTCTCTCCCTCC                          |
| ChIP-TuACO3-9   | ChIP-qPCR                                                                             | GAGACCAGCGTACGCAAGAGC                    | ACGCATCAAAGCTTCATGGTG                      |
| ChIP-TuACO3-10  | ChIP-qPCR                                                                             | GATGCGTACAGGAGTGCAGC                     | CGACAGCCAGCAGCAGTAGC                       |
| ChIP-TuACO3-11  | ChIP-qPCR                                                                             | GCTGGCTGTCGCTGAGTAGG                     | GGGACACCGGTCGATTGTGT                       |
| ChIP-TuACO3-12  | ChIP-qPCR                                                                             | CGGTGTCCCGGACAGCAGC                      | CAGAGATTAGGCCTAGTAC                        |
| ChIP-TuACO3-13  | ChIP-qPCR                                                                             | CCTAATCTCTGTCATTATCA                     | CACTATTCTATATACCTAAAT                      |
| ChIP-TuACO3-14  | ChIP-qPCR                                                                             | AGAATAGTGGCCAACGTAGAC                    | CCTAACCAAGTTGTCTTCAAG                      |
| ChIP-TuACO3-15  | ChIP-qPCR                                                                             | TAGGGCATGTACAATGGTTG                     | TATTGAAGATAAGACTAAG                        |
| ChIP-TuACO3-16  | ChIP-qPCR                                                                             | CTTCAATAACTAGTTATTCT                     | TAATGAGGTGGAGGAGAGAG                       |
| ChIP-TuACO3-17  | ChIP-qPCR                                                                             | CCTCCACCTCATTATTTATCC                    | CCAGTTAGTTAGCTAAACGG                       |
| ChIP-TuACO3-18  | ChIP-qPCR                                                                             | GCTAACTAACTGGGGCATAT                     | TACGACACAGCTTAATTTGT                       |
| ChIP-TuACO3-19  | ChIP-qPCR                                                                             | ACAAATTAAGCTGTGTCGTAAT                   | GCTGAAGCAGAGAGTGTGTG                       |
| ChIP-TuACO3-20  | ChIP-qPCR                                                                             | GCTTCAGCTAACCAGCACAAAG                   | CGCTCTCTCTCTCTCTCTC                        |
| EMSA-TuACO3-E1  | EMSA probe                                                                            | CCCCGTTCCATACTGACGATTGACCAAAGTGATTATATAA | TTATAAATCACTTTGGTCAATCGTCAGTATGGAACGGGG    |
| EMSA-TuACO3-E3  | EMSA probe                                                                            | ATATTTGGTTAGTAAAGTTGATGACCTAAAAACCGCACGC | GCGTGGGGTTTTAGGTCATCAACTTTACTAACCAAATAT    |
| EMSA-TuACO3-E4  | EMSA probe                                                                            | GCTTTCCGTGACGGATAAGACATATTTGGTTAGTAAAGT  | ACTTTACTAACCAAATATGTCTTATCCGTCACGAAAGC     |
| EMSA-TuACO3-mE1 | EMSA probe                                                                            | CCCCGTTCCATACTGACGATTGAAAAAATGATTATATAA  | TTATAAATCATTTTTTCAATCGTCAGTATGGAACGGGG     |
| EMSA-TuACO3-mE3 | EMSA probe                                                                            | ATATTTGGTTAGTAAAGTTGATGAAAAAACCAGCACGC   | GCGTGGGGTTTTTTCATCAACTTTACTAACCAAATAT      |
| EMSA-TuACO3-mE4 | EMSA probe                                                                            | GCTTTCCGTGACGGATAAGACATTTTTTTTAGTAAAGT   | ACTTTACTAAAAAATGTCTTATCCGTCACGAAAGC        |

**Table S2** List of six *T. urartu* genes found in two independent Y1H screens\*

| <b>Gene</b>               | <b>Protein encoded</b>                                   |
|---------------------------|----------------------------------------------------------|
| <i>TuG1812G0200003631</i> | Calmodulin-binding protein 60 D-like isoform X2          |
| <i>TuG1812G0300001837</i> | DDB1- and CUL4-associated factor 13                      |
| <i>TuG1812G0300004040</i> | Phosphatidylinositol:ceramide inositolphosphotransferase |
| <i>TuG1812G0500001166</i> | Transcription factor MYB46                               |
| <i>TuG1812G0500002238</i> | Transducin/WD40 repeat-like superfamily protein          |
| <i>TuG1812G0700002677</i> | TBC1 domain family member 5 homolog A                    |

\*The CDS and deduced amino acid sequences of the six genes are provided in Dataset S1.

**Table S3** Significantly enriched biological processes identified by GO analysis\*

| GO term     | Description                     | P -value | Regulation | Representative <i>T. urartu</i> genes in the enriched process                                                                                                                                                                                                                                                 |
|-------------|---------------------------------|----------|------------|---------------------------------------------------------------------------------------------------------------------------------------------------------------------------------------------------------------------------------------------------------------------------------------------------------------|
| GO: 0006032 | Chitin catabolic process        | 6.60E-06 | Up         | <i>Homolog of carrot EP3-3 chitinase (TuG1812G0200004053)</i><br><i>Homolog of carrot EP3-3 chitinase (TuG1812G0200004054)</i><br><i>Basic chitinase (TuG1812G0100002418)</i><br><i>Basic chitinase (TuG1812G0300003072)</i>                                                                                  |
| GO: 0030244 | Cellulose biosynthetic process  | 0.00065  | Up         | <i>Cellulose synthase-like D3 (TuG1812G0700003174)</i><br><i>Cellulose synthase-like D5 (TuG1812S0000765300)</i><br><i>Cellulose synthase A4 (TuG1812S0001895600)</i><br><i>Cellulose synthase family protein (TuG1812G0500002544)</i><br><i>Hydroxyl methylglutaryl CoA reductase 1 (TuG1812G0700002624)</i> |
| GO: 0008299 | Isoprenoid biosynthetic process | 0.0012   | Up         | <i>Farnesyl diphosphate synthase 1 (TuG1812G0100004098)</i><br><i>GHMP kinase family protein (TuG1812G0500004644)</i><br><i>Deoxyxylulose-5-phosphate synthase (TuG1812G0100002961)</i><br><i>Cytochrome P450 (TuG1812G0500001523)</i>                                                                        |
| GO: 0055114 | Oxidation reduction             | 2.40E-07 | Down       | <i>Cytochrome P450 (TuG1812G0400002828)</i><br><i>Polyamine oxidase 5 (TuG1812G0300002967)</i><br><i>Alcohol dehydrogenase 1 (TuG1812G0400001050)</i><br><i>Heavy metal transport/detoxification superfamily protein (TuG1812G0500005269)</i>                                                                 |
| GO: 0030001 | Metal ion transport             | 0.00017  | Down       | <i>Heavy metal transport/detoxification superfamily protein (TuG1812S0000313700)</i><br><i>Tonoplast dicarboxylate transporter (TuG1812G0300002099)</i><br><i>Magnesium transporter 4 (TuG1812G0300004483)</i>                                                                                                |

\*GO enrichment analysis of the up- or down-regulated DEGs shared by the two treatments was accomplished using the software agriGO (<http://bioinfo.cau.edu.cn/agriGO/>). The CDS and deduced amino acid sequences of the six genes are provided in Dataset S1.

**Table S4** Expression changes of the four chitinase genes up-regulated by both ethylene treatment and *Bgt* infection

| <b>Gene</b>               | <b>Treatment</b>     | <b>0 h<br/>(control)</b> | <b>24 h<br/>(post treatment)</b> | <b>Log2<br/>(Fold_change)</b> |
|---------------------------|----------------------|--------------------------|----------------------------------|-------------------------------|
| <i>TuG1812G0100002418</i> | Ethylene             | 5.9832*                  | 64.2132                          | 3.4238                        |
|                           | <i>Bgt</i> infection | 5.5522                   | 2851.4400                        | 9.0044                        |
| <i>TuG1812G0200004053</i> | Ethylene             | 11.1727                  | 84.0994                          | 2.9121                        |
|                           | <i>Bgt</i> infection | 10.4543                  | 82.1065                          | 2.9734                        |
| <i>TuG1812G0200004054</i> | Ethylene             | 0.4373                   | 5.4552                           | 3.6407                        |
|                           | <i>Bgt</i> infection | 0.4073                   | 96.9208                          | 7.8944                        |
| <i>TuG1812G0300003072</i> | Ethylene             | 0.9015                   | 4.3136                           | 2.2584                        |
|                           | <i>Bgt</i> infection | 0.8319                   | 474.3240                         | 9.1551                        |

\*Mean value of transcript level (represented by fragments per kilobase of exon per million transcriptomic reads) calculated from three biological replicates.



**Table S5** Presence of putative MYB46 recognition sites in the 2 kb promoter region of the five genes related to cellulose or isoprenoid synthesis\*

| Gene                      | Protein encoded             | Potential TuMYB46L binding sites | Treatment            | 0 h (control)        | 24 h (post treatment) | Log2 (Fold_change) |
|---------------------------|-----------------------------|----------------------------------|----------------------|----------------------|-----------------------|--------------------|
| <i>TuG1812G0200004302</i> | Phenylalanine ammonia lyase | ACCAAAT (-707 to -714)           | <i>Bgt</i> infection | 3.12                 | 19.18                 | 2.62               |
|                           |                             | ACCAACC (-382 to -375)           | Ethylene             | 3.33                 | 7.41                  | 1.15               |
|                           |                             | ACCAACC (-229 to -222)           |                      | 0.82                 | 18.46                 | 4.47               |
| <i>TuG1812G0100000551</i> | Phenylalanine ammonia lyase | ACCAAAT (-1433 to -1426)         | <i>Bgt</i> infection | 0.82                 | 18.46                 | 4.47               |
|                           |                             | ACCAACC (-254 to -247)           | Ethylene             | 0.89                 | 9.15                  | 3.36               |
|                           |                             | ACCAACC (-85 to -78)             |                      | 3.14                 | 24.22                 | 2.94               |
| <i>TuG1812G0500002544</i> | Cellulose synthase A9       | ACCAACT (-1451 to -1444)         | <i>Bgt</i> infection | 3.14                 | 24.22                 | 2.94               |
|                           |                             | ACCAAAT (-805 to -798)           | Ethylene             | 3.36                 | 25.35                 | 2.91               |
|                           |                             | ACCAACC (-325 to -318)           |                      | 7.33                 | 36.17                 | 2.31               |
| <i>TuG1812S0001895600</i> | Cellulose synthase A4       | ATTTGGT (-1974 to -1967)         | <i>Bgt</i> infection | 7.33                 | 36.17                 | 2.31               |
|                           |                             | GGTTGGT (-186 to -179)           | Ethylene             | 7.87                 | 23.11                 | 1.55               |
|                           |                             | ATTAGGT (-1987 to -1980)         |                      | <i>Bgt</i> infection | 2.68                  | 18.55              |
| <i>TuG1812G0700003174</i> | Cellulose synthase-like D3  | GGTAGGT (-477 to -470)           | Ethylene             | 2.85                 | 13.83                 | 2.27               |
|                           |                             | GGTAGGT (-473 to -466)           |                      |                      |                       |                    |

\*The five genes were among the up-regulated DEGs shared by *Bgt* infection and ethylene treatment (see also Table S2).

## Methods S1 Additional description of methods

### Treatment with ACC, aminoethoxyvinylglycine or ethylene

The seedlings of *T. urartu* and KN199 (at one-leaf stage) were treated with 10 ppm ethylene in sealed 50 ml Falcon tubes for 24 h at 22°C (Yin *et al.*, 2015), and used in subsequent experiments. Treatment of *T. urartu* and KN199 seedlings by ACC (20 µM, Sigma, A3903) or aminoethoxyvinylglycine (AVG, 10 µM, Sigma, A6685) was accomplished by spraying, with the sprayed seedlings used for the desired analysis after 24 h at 22°C.

### Gene expression analysis by qRT-PCR

Total RNA was extracted using the TriPure Isolation reagent (Roche, 11667165001). The cDNAs were synthesized using the GoScript Reverse Transcription System (Promega, A5000), followed by quantification in the LightCycler 480 II Real-time System (Roche Diagnostics, Penzberg, Germany) with TB Green Premix ExTaq (TaKaRa, RR420A). An *Actin* gene (GenBank accession AB181991), conserved in both common wheat and *T. urartu* (Zhang *et al.*, 2016), was used as internal control for qRT-PCR. Each assay was repeated at least 3 times using independent biological replicates.

### Single-cell functional assay

At 4 h after transfections with pUbi:TuACO3 or pUbi:TuMYB46L, the leaves were inoculated with *Bgt*, with haustorium index determined using the leaf segments collected at 48 hpi. The transfections with pUbi:TuACO3as or pUbi:TuMYB46Las were accomplished similarly except that *Bgt* inoculation was performed at 48 h of the bombardment. Each transient expression or silencing assay had 3 technical repeats, with at least 200 cells with GUS expression and *Bgt* mycelia examined for each repeat. Haustorium index was calculated as the percentage of examined cells with *Bgt* haustorium (Zhang *et al.*, 2016).

### Immunoblotting assay

Total leaf proteins, extracted from about 100 mg tissues, were separated in 12%

SDS-PAGE, followed by transferring to nitrocellulose membrane (Amersham Corp., 10600002). After antibody-antigen reaction, the signals were detected using the SuperSignal West Pico Chemiluminescent Substrate Kit (Thermo Fisher Scientific Inc., 34078). A parallel assay, conducted with a polyclonal antibody specific for plant actin proteins (Bioeasy Corp., BE0027), was performed as control for equal protein loading. Ponceau S staining was also conducted for checking equal loading.

### Virus induced gene silencing

BSMV:ACO3as, BSMV:MYB46Las and the empty vector control (BSMV:EVC) were each introduced into at least 50 G1812 seedlings by mechanical inoculation. At 10 days after BSMV infection, the seedlings with clear BSMV symptoms ( $n \geq 40$ ) were used for further analysis. After confirming the silencing of *TuACO3* or *TuMYB46L* expression by qRT-PCR, the seedlings were inoculated with *Bgt* as outlined above, with the inoculated leaves collected at 72 hpi for checking *Bgt* microcolonies. Ethylene content was measured either before *Bgt* inoculation or at 24 hpi of *Bgt* by placing 4 seedlings into a 300 ml glass bottle.

The common wheat orthologs of *TuACO3* and *TuMYB46L*, i.e., *TaACO3* and *TaMY46L*, were identified through Blast search of the genomic sequence of Chinese Spring at the website [http://plants.ensembl.org/Triticum\\_aestivum/Info/Index](http://plants.ensembl.org/Triticum_aestivum/Info/Index). The VIGS inducing fragment in BSMV:ACO3as was highly conserved in *TaACO3* (93.4% identical). Likewise, the VIGS inducing fragment in BSMV:MYB46Las was strongly conserved in *TaMYB46L* (99.2% identical). Consequently, the two viruses were also employed to silence *TaACO3* and *TaMY46L* in the common wheat cultivar KN199, respectively, with downstream analyses conducted as described above.

### Yeast one-hybrid assay

The control construct pABAi:TuACO3mpro was prepared as described for pABAi:TuACO3pro, except that the promoter region of *TuACO3* was mutated by changing all four putative MYB46 binding sites (Fig. S5b) into AAAAAAA. The mutant promoter region was synthesized commercially (Genewiz, Nanjing, China, <https://climspod.genewiz.com.cn/>). Another control construct, pGADT7:GFP, was

developed by cloning the GFP coding sequence into the vector pGADT7 using the primers listed in Table S1.

### Effector-promoter reporter assay

The promoter region (2 kb) of *TuACO3* was cloned into the pLL00r:LUC vector carrying the coding sequence of luciferase (Zhang *et al.*, 2015), producing the reporter construct pTuACO3pro:LUC. The cDNA coding region of *TuMYB46L* was cloned into the pRI101 vector, generating the effector plasmid p35S:TuMYB46L. The *Agrobacterium* strains carrying p35S:TuMYB46L and pTuACO3pro:LUC were employed for effector-promoter reporter assay, which was performed in the leaves of 5-week-old *N. benthamiana* plants (Zhang *et al.*, 2015). The construct pTuACO3mpro:LUC, carrying the mutated promoter region of *TuACO3*, was also prepared and used as a negative control. The mutant promoter region was synthesized commercially (see above). The T-DNA construct p35S:GFP, expressing free green fluorescence protein, was used as an additional control for the assay. This construct was developed by cloning the coding sequence of GFP into the pRI101 vector. The assay was repeated 3 times, with each performed using three biological replicates.

### Nuclear localization assay

A T-DNA construct, p35S:TuMYB46L-YFP, was prepared by in frame fusion of the coding sequence of *TuMYB46L* to the 5' end of YFP coding region in the vector CTAPi-GW-mYFP (Bai *et al.*, 2012). Expression of the TuMYB46L-YFP fusion protein in *Nicotiana benthamiana* leaf cells and examination of its nuclear localization by Confocal microscopy were executed as reported by Bai *et al.* (2012).

### RNA sequencing and GO analysis of differentially regulated genes

The high-quality reads were mapped to the draft genome sequence of *T. urartu* (Ling *et al.*, 2018) with the software RSEM (Li & Dewey, 2011). Two criteria were used to identify differentially expressed genes, 1) a Log2 ratio >1.0 and 2) the expression difference was consistently observed in between different biological replicates. Gene ontology (GO) enrichment analysis was accomplished using the software agriGO (<http://bioinfo.cau.edu.cn/agriGO/>).

## Analysis of chitinase genes and chitinase enzyme assay

In the first set of chitinase assays, total chitinase activities were measured for the G1812 seedlings treated by 10 ppm ethylene (for 24 h) or infected by *Bgt* (for 24 h) and the controls. The second set of chitinase assays used the transgenic lines overexpressing *TuACO3* (TuACO3-OX1 and -OX2) or *TuMYB46L* (TuMYB46L-OX1 and -OX2) and their corresponding WTS controls. Each assay was repeated 3 times using independent biological replicates.

## Bioinformatic analysis

The search of MYB46 binding sites in gene promoters was performed using the DNAMAN program (<https://www.lynnon.com/dnaman.html>). Alignment of amino acid sequences used the software Clustal Omega (<https://www.ebi.ac.uk/Tools/msa/clustalo/>). Phylogenetic tree was built with the neighbor joining algorithm (installed at the MEGA website <https://www.megasoftware.net/>) and the complete deletion distance option were employed for tree construction. The bootstrap values were obtained using 1000 replications.

## References

- Bai S, Liu J, Chang C, Zhang L, Maekawa T, Wang Q, Xiao W, Liu Y, Chai J, Takken FL *et al.* 2012.** Structure-function analysis of barley NLR immune receptor MLA10 reveals its cell compartment specific activity in cell death and disease resistance. *PLoS Pathogens* **8**: e1002752.
- Li B, Dewey CN. 2011.** RSEM: accurate transcript quantification from RNA-Seq data with or without a reference genome. *BMC Bioinformatics* **12**: 323.
- Ling HQ, Ma B, Shi X, Liu H, Dong L, Sun H, Cao Y, Gao Q, Zheng S, Li Y *et al.* 2018.** Genome sequence of the progenitor of wheat A subgenome *Triticum urartu*. *Nature* **557**: 424-428.
- Yin CC, Ma B, Collinge DP, Pogson BJ, He SJ, Xiong Q, Duan KX, Chen H, Yang C, Lu X *et al.* 2015.** Ethylene responses in rice roots and coleoptiles are differentially regulated by a carotenoid isomerase-mediated abscisic acid pathway. *Plant Cell* **27**: 1061-1081.

**Zhang J, Zheng H, Li Y, Li H, Liu X, Qin H, Dong L, Wang D. 2016.** Coexpression network analysis of the genes regulated by two types of resistance responses to powdery mildew in wheat. *Scientific Reports* **6**: 23805.

**Zhang Z, Yang J, Wu Y. 2015.** Transcriptional regulation of zein gene expression in maize through the additive and synergistic action of opaque2, prolamine-box binding factor, and O2 heterodimerizing proteins. *Plant Cell* **27**: 1162-1172.
